# Supplementary material for: The avian-specific small heat shock protein HSP25 is a constitutive protector against environmental stresses during blastoderm dormancy
Source: PubMed Central journal article supplement (PMC5101479; doi:10.1038/srep36704), 2016-11-09
Supplement: srep36704-s1.pdf [file srep36704-s1.pdf]

**The avian-specific small heat shock protein HSP25 is a constitutive protector against environmental stresses during blastoderm dormancy**

Young Sun Hwang<sup>1</sup>, Mee Hyun Ko<sup>1</sup>, Young Min Kim<sup>1</sup>, Young Hyun Park<sup>1</sup>, Tamao Ono<sup>2</sup> and Jae Yong Han<sup>1,3,\*</sup>

<sup>1</sup>Department of Agricultural Biotechnology and Research Institute of Agriculture and Life Sciences, College of Agriculture and Life Sciences, Seoul National University, Seoul 08826, Korea. <sup>2</sup>Division of Animal Science, Faculty of Agriculture, Shinshu University, Minamiminowa, Nagano 399-4598, Japan.

<sup>3</sup>Institute for Biomedical Sciences, Shinshu University, Minamiminowa, Nagano 399-4598, Japan.

\*Correspondence and requests for materials should be addressed to J.Y.H (email: jaehan@snu.ac.kr)

**Supplementary Table S1. Primers used for quantitative real-time PCR**

| Accession No.                 | Gene                             | Primer sequences     |                       |
|-------------------------------|----------------------------------|----------------------|-----------------------|
|                               |                                  | Forward (5'→3')      | Reverse (5'→3')       |
| NM_204305<br>(Chicken)        | <i>GAPDH</i>                     | GGTGGTGCTAAGCGTGTTAT | ACCTCTGTCATCTCTCCACA  |
| XM_015873412<br>(Quail)       | <i>GAPDH</i>                     | GGGAAGTTGTGGAGGGATGG | GGTTGGCACACGGAAAGCCA  |
| NM_001198610<br>(Zebra finch) | <i>GAPDH</i>                     | GGGAAGTTGTGGAGGGATGG | GGTTGGCACACGGAAAGCCA  |
| NM_205518                     | <i>ACTB</i>                      | AGGAGATCACAGCCCTGGCA | CAATGGAGGGTCCGGATTCA  |
| NM_001010842<br>(Chicken)     | <i>HSP25</i>                     | AGTTCATGAGCAGCTTCGAG | GTGTTCTGCGTCTCCTTCTG  |
| XM_015885650<br>(Quail)       | <i>HSP25</i>                     | AGTTCATGAGCAGCTTCGAG | GTGTTCTGCGTCTCCTTCTG  |
| NM_001245736<br>(Zebra finch) | <i>HSP25</i>                     | AGTTCATGAGCAGCTTCGAG | CTTG TAGGAGAAGGAGCCCT |
| XM_003642832<br>(Chicken)     | <i>HSP30CL</i>                   | GGCAGTTCATGAGCAGCTTC | ACTTG TAGGAGAAGGAGCCC |
| XM_015885649<br>(Quail)       | <i>HSP30CL</i>                   | TGGAGATGGAGAGAGCTCGG | ACTTG TAGGAGAAGGAGCCC |
| XM_004174664<br>(Zebra finch) | <i>HSP30CL</i>                   | TGGAGATGGAGAGAGCTCGG | ACTTG TAGGAGAAGGAGCCC |
| NM_205290                     | <i>HSPB1</i>                     | CGTGCCCTTCACCTTCCTCA | TGGGCAGCAGACGGAAGTATC |
| NM_001001527                  | <i>HSPB2</i>                     | GGCCTCGGATCAACAAGCAG | TCTCGGGAGATGAAGCCGTG  |
| XM_001231557                  | <i>HSPB3</i>                     | CTGCCGAGGAGCTGGAAGAA | CTGGGCGAAACTGCACAACA  |
| NM_001030797                  | <i>HSPB4</i>                     | TTACCATCCAGCACCCCTGG | GAAATGCCCGACTCCAGCAC  |
| NM_205176                     | <i>HSPB5</i><br>( <i>CRYAB</i> ) | CCAGGGCCATTCAAGAGCAC | CGTGGCTTCCTTGAGCCAAC  |
| XM_427836                     | <i>HSPB7</i>                     | CCCGGATGCAAACAAGAAGC | TTGGTGACCTTCCAGGTGGG  |
| XM_415280                     | <i>HSPB8</i>                     | GCGTCAACGTGCACAGCTTC | AGGCGAAGACAGTGATGGGG  |
| XM_418368                     | <i>HSPB10</i>                    | GCTTTTTGGAGGACCACGAG | GTTTTCTCCGTACACTGGCC  |
| NM_001277613                  | <i>HSPB11</i>                    | TGGCTTTCCCAAGAGTGTGA | TCACCCTGTGCACTGATACA  |
| NM_001146142                  | <i>NANOG</i>                     | AACTCTGCGGGGCTGTCTTG | AAAAGTGGGGCGGTGAGATG  |
| NM_001110178                  | <i>POUV</i>                      | TGAAGGGAACGCTGGAGAGC | ATGTCACTGGGATGGGCAGAC |
| NM_205188                     | <i>SOX2</i>                      | CCCCTTTCATACCCCTCCCT | CGGGCTGTTCTTCTGGTTGTT |
| NM_204700                     | <i>CRIPTO</i>                    | CGACACAGCGCAAAGCAAT  | AGCCCTTCATCACCCAGTCG  |
| NM_205339                     | <i>BCL2</i>                      | CTTTATCCTCCTGCCCTCG  | TTCTTCCGCTTCGTCAGCAA  |
| NM_001025304                  | <i>BCL2L1</i>                    | TTCAGCGACCTCACCTCCCA | GCCCCAGTTCACACCATCA   |
| NM_001031215                  | <i>CAT</i>                       | TCAGAAGCCAGATGCCTTGA | CCTTTCGCATGCACA ACTCT |

---

|              |                 |                       |                       |
|--------------|-----------------|-----------------------|-----------------------|
| NM_001277853 | <i>GPX1</i>     | CATGTTGCGAGAAGTGCGAGG | AAGTTCCAGGAGACGTCGTT  |
| NM_001277854 | <i>GPX2</i>     | CTTCTACGACCTCAGTGCCA  | TGAGGCAGTTGAGGATCTCC  |
| NM_001163232 | <i>GPX3</i>     | GAACTCCGAGATCCTCCCTG  | GGCTCCCAGAAGAGGTTCTT  |
| XM_003642871 | <i>GPX4</i>     | GAGGTGGCGGGATGGGTT    | GTACTGCTCCAGGGACACAT  |
| NM_001163245 | <i>GPX7</i>     | AAGCCTTCCTCTTCCTTCCC  | GACAACCTAACGACACCGAGC |
| XM_423834    | <i>GPX8</i>     | GGTTGTAAACGTGGCGAGTT  | TTCCCTTTGGCAAAGCCTC   |
| XM_421555    | <i>PTEN</i>     | CCGTTGGTCAACTTTGCTCA  | CATGTCCCCAGGTAACCACT  |
| XM_416328    | <i>DRAM1</i>    | GTGGCCTTTGGTTTCGTCTT  | TGCTCCTCTGCAATTCTCCA  |
| NM_001006332 | <i>BECN1</i>    | GCTGAAGCTCGATACCTCCT  | ATTCTGGCTGGTGGGATGAA  |
| NM_001030839 | <i>UVRAG</i>    | AAGTACTTGGGGCAGCAGAT  | AGCTCTGTGAAGCCTAAGCA  |
| XM_003643073 | <i>ATG12</i>    | AGTTGTCTGCTTGCATGGTG  | ATCGGTTCCAGTGCCACTTA  |
| NM_001006409 | <i>ATG5</i>     | GGGCATGTAACTGCTTGCT   | CGGTGAAGAAAAGCAGCAGT  |
| NM_001030592 | <i>ATG7</i>     | ATCAAGAGACACAGGCTGCT  | TCATGGCAGTCAGAATGGGT  |
| NM_001031461 | <i>MAP1LC3B</i> | TGTACGAGAGCGAGAAGGAC  | GCGTAGGTGACATCCGTTTC  |

---

**Supplementary Table S2. List of *HSP25*-specific siRNA sequences for knockdown experiments**

| Accession No. | Gene                            | Sequences                                                         | Start position |
|---------------|---------------------------------|-------------------------------------------------------------------|----------------|
| NM_001010842  | <i>HSP25</i>                    | S 5'-GAGAAGGCUCGGCAGUUCA UU-3'<br>AS 5'-UGAACUGCCGAGCCUUCUC UU-3' | 296            |
|               |                                 | S 5'-CAGAAGGAGACGCAGAACA UU-3'<br>AS 5'-UGUUCUGCGUCUCCUUCUG UU-3' | 497            |
| N/A           | Non-specific siRNA <sup>#</sup> | S 5'-CCUACGCCACCAAUUUCGU-3'<br>AS 5'-GGAUGCGGUGGUUAAAGCA -3'      | N/A            |

<sup>#</sup> The non-specific siRNA has no complementary sequence in the chicken genome and was used as a control for gene silencing.
